# Supplementary material for: Efficacy of Plinabulin vs Pegfilgrastim for Prevention of Docetaxel-Induced Neutropenia in Patients With Solid Tumors: A Randomized Clinical Trial
Source: PubMed Central journal article supplement — JAMA Netw Open. 2022 Jan 27;5(1):e2145446. doi: 10.1001/jamanetworkopen.2021.45446 (PMC8796017; doi:10.1001/jamanetworkopen.2021.45446), 2022-01-27
Supplement: jamanetwopen-e2145446-s002.pdf [file jamanetwopen-e2145446-s002.pdf]

## Supplementary Online Content

Blayney DW, Mohanlal R, Adamchuk H, et al. Efficacy of plinabulin vs pegfilgrastim for prevention of docetaxel-induced neutropenia in patients with solid tumors: a randomized clinical trial. *JAMA Netw Open*. 2022;5(1):e2145446.  
doi:10.1001/jamanetworkopen.2021.45446

**eTable 1.** Patient Disposition and Demographics

**eTable 2.** Reasons for Discontinuations Categorized as Other

**eTable 3.** Listing of All-Cause Hospitalizations

**eTable 4.** Summary of Infections

**eTable 5.** Summary and Analysis of Patients With Neutrophil-to-Lymphocyte Ratio (NLR) >5 After Days 7-15 in Cycle 1

**eTable 6.** Summary and Analysis of Patients With Promyelocyte Plus Myelocyte Counts >0 After Days 7-15 in Cycle 1—ITT Analysis Set

**eTable 7.** Summary and Analysis of Patients With Thrombocytopenia (All Grades) in Cycles 1-4

**eTable 8.** Summary and Analysis of EQ-5D-5L Evaluation—Safety Analysis Set

**eTable 9.** Summary of Patients With Bone Metastasis

**eFigure 1.** Mean Change From Baseline for Platelets (Gi/L) by Study Day for Cycle 1—ITT Analysis Set

**eFigure 2.** Summary and Analysis of Patients With Band Counts >0, Cycle 1, Days 1-15

This supplementary material has been provided by the authors to give readers additional information about their work.

eTable 1. Patient Disposition and Demographics

| Parameter                                                                       | Peg<br>(N=53)<br>n (%) | Plin<br>(N=52)<br>n (%) | All Patients<br>(N=105)<br>n (%) |
|---------------------------------------------------------------------------------|------------------------|-------------------------|----------------------------------|
| <b>All Subjects</b>                                                             |                        |                         | 135                              |
| <b>All Randomized Subjects</b>                                                  | 53 (100.0)             | 52 (100.0)              | 105 (100.0)                      |
| <b>Stratification Category</b>                                                  |                        |                         |                                  |
| Breast Cancer and Asia                                                          | 18 (34.0)              | 18 (34.6)               | 36 (34.3)                        |
| Breast Cancer and Non-Asia                                                      | 8 (15.1)               | 9 (17.3)                | 17 (16.2)                        |
| HRPC and Non-Asia                                                               | 10 (18.9)              | 9 (17.3)                | 19 (18.1)                        |
| NSCLC and Asia                                                                  | 7 (13.2)               | 7 (13.5)                | 14 (13.3)                        |
| NSCLC and Non-Asia                                                              | 10 (18.9)              | 9 (17.3)                | 19 (18.1)                        |
| <b>Analysis Population<sup>a</sup></b>                                          |                        |                         |                                  |
| ITT Population                                                                  | 53 (100.0)             | 52 (100.0)              | 105 (100.0)                      |
| Safety Population                                                               | 53 (100.0)             | 52 (100.0)              | 105 (100.0)                      |
| <b>Treatment Completion</b>                                                     |                        |                         |                                  |
| Completed                                                                       | 39 (73.6)              | 45 (86.5)               | 84 (80.0)                        |
| Early Discontinued                                                              | 14 (26.4)              | 7 (13.5)                | 21 (20.0)                        |
| <b>Reason for Discontinuation<sup>b</sup></b>                                   |                        |                         |                                  |
| Adverse Event                                                                   | 1 (4.8)                | 1 (4.8)                 | 2 (9.5)                          |
| Other <sup>c</sup>                                                              | 8 (38.1)               | 3 (14.3)                | 11 (52.4)                        |
| Prohibited Concomitant Medication or Therapy                                    | 1 (4.8)                | 0                       | 1 (4.8)                          |
| Protocol Prohibited Dose Delay                                                  | 1 (4.8)                | 0                       | 1 (4.8)                          |
| Withdrawal by Subject                                                           | 3 (14.3)               | 3 (14.3)                | 6 (28.6)                         |
| <b>Age (Years)</b>                                                              |                        |                         |                                  |
| Mean (SD)                                                                       | 58.9 (10.85)           | 57.0 (10.79)            | 58.0 (10.81)                     |
| Median                                                                          | 60.0                   | 58.5                    | 59.0                             |
| Min, Max                                                                        | 36, 81                 | 31, 81                  | 31, 81                           |
| <b>Age Category: n (%)</b>                                                      |                        |                         |                                  |
| <65 Years                                                                       | 34 (64.2)              | 40 (76.9)               | 74 (70.5)                        |
| ≥65 Years                                                                       | 19 (35.8)              | 12 (23.1)               | 31 (29.5)                        |
| <b>Sex: n (%)</b>                                                               |                        |                         |                                  |
| Male                                                                            | 21 (39.6)              | 19 (36.5)               | 40 (38.1)                        |
| Female                                                                          | 32 (60.4)              | 33 (63.5)               | 65 (61.9)                        |
| <b>Risk Factors: n (%)</b>                                                      |                        |                         |                                  |
| Prior chemotherapy or radiation treatment                                       | 49 (92.5)              | 51 (98.1)               | 100 (95.2)                       |
| Bone marrow involvement by tumor                                                | 0                      | 1 (1.9)                 | 1 (0.95)                         |
| Surgery and/or open wounds within 4 weeks of first administration of study drug | 2 (3.8)                | 2 (3.8)                 | 4 (3.8)                          |
| Age >65 years of age and receiving full chemotherapy dose intensity             | 19 (35.8)              | 12 (23.1)               | 31 (29.5)                        |
| 1 Risk factor only                                                              | 36 (67.9)              | 38 (73.1)               | 74 (70.5)                        |
| 2 Risk factors                                                                  | 17 (32.1)              | 14 (26.9)               | 31 (29.5)                        |
|                                                                                 |                        |                         |                                  |
|                                                                                 |                        |                         |                                  |

Abbreviations: ECOG: Eastern Cooperative Oncology Group; HRPC: Hormone-refractory (androgen-independent) prostate cancer; ITT: Intent to treat; N: Total number of patients; n: Number of patients; NSCLC: Non-small cell lung cancer; Peg: Pegfilgrastim; Plin: Plinabulin; SD: Standard deviation.

Peg: Docetaxel (75 mg/m<sup>2</sup>) + pegfilgrastim (6 mg); Plin: Docetaxel (75 mg/m<sup>2</sup>) + plinabulin (40 mg)

a. For the treatment assignments, ITT included patients that had been randomized in the study, while Safety included patients that had been randomized in the study and had received at least one dose of study medication

b. Percentages based on the total number of discontinuations

c. Details regarding what was categorized as “Other” are provided in **eTable 2 in the Supplement**.

eTable 2. Reasons for Discontinuations Categorized as Other

| <b>Subject</b> | <b>Treatment Group</b> | <b>Reason for Discontinuation</b>                |
|----------------|------------------------|--------------------------------------------------|
| 1              | Pegfilgrastim          | Other: General Health Deterioration. ECOG 2      |
| 2              | Pegfilgrastim          | Other: Disease Progression                       |
| 3              | Pegfilgrastim          | Other: Progressive Disease                       |
| 4              | Pegfilgrastim          | Other: Death (Study Disease)                     |
| 5              | Plinabulin             | Other: Disease Progression                       |
| 6              | Pegfilgrastim          | Other: Violation of Standard Inclusion/Exclusion |
| 7              | Pegfilgrastim          | Other: Voluntary Refund Group                    |
| 8              | Plinabulin             | Other: Disease Progression                       |
| 9              | Pegfilgrastim          | Other: Disease Progression                       |
| 10             | Pegfilgrastim          | Other: Disease Progression                       |
| 11             | Plinabulin             | Other: Disease Progression                       |

eTable 3. Listing of All-Cause Hospitalizations

| Subject | Treatment Group | Reported Term   | Reasons for Hospitalization | Details for Hospitalization                                            | Cycle     | Start Date | End Date   |
|---------|-----------------|-----------------|-----------------------------|------------------------------------------------------------------------|-----------|------------|------------|
| 1       | Plinabulin      | Hospitalization | AE                          | AE25_anemia                                                            | Cycle 4   | 2018-12-26 | 2018-12-27 |
| 2       | Plinabulin      | Hospitalization | AE                          | AE4_status asthmaticus                                                 | Cycle 4   | 2018-10-13 | 2018-10-20 |
| 3       | Plinabulin      | Hospitalization | AE                          | AE9_massive thrombembolia of the L                                     | Follow-up | 2018-11-16 | 2018-11-22 |
| 4       | Plinabulin      | Hospitalization | Other                       | Due to neutrophil count decreased and white blood cell count decreased | Cycle 1   | 2018-06-22 | 2018-06-25 |
| 5       | Plinabulin      | Hospitalization | AE                          | AE10_vomiting                                                          | Cycle 1   | 2018-08-03 | 2018-08-15 |
|         |                 | Hospitalization | AE                          | AE11_febrile neutropenia <sup>a</sup>                                  | Cycle 1   | 2018-08-03 | 2018-08-15 |
| 6       | Plinabulin      | Hospitalization | AE                          | AE12_aspartic aminotransferase increase                                | Cycle 2   | 2018-09-04 | 2018-09-13 |
| 7       | Plinabulin      | ICU stay        | AE                          | AE10_lung infection                                                    | Cycle 1   | 2018-09-09 | 2018-09-25 |
| 8       | Pegfilgrastim   | Hospitalization | AE                          | AE3_febrile neutropenia <sup>a</sup>                                   | Cycle 1   | 2018-08-20 | 2018-08-21 |
| 9       | Pegfilgrastim   | Hospitalization | Other                       | The subject was hospitalized for follow-up treatment <sup>b</sup>      | Cycle 4   | 2018-08-31 | 2018-09-18 |
| 10      | Pegfilgrastim   | Hospitalization | AE                          | AE1_lung infection                                                     | Cycle 4   | 2018-10-17 | 2018-11-10 |
| 11      | Pegfilgrastim   | Hospitalization | AE                          | AE7_hepatic injury                                                     | Cycle 2   | 2018-08-30 | 2018-09-21 |
| 12      | Pegfilgrastim   | Hospitalization | AE                          | AE1_vaginal hemorrhage                                                 |           | 2018-07-25 | 2018-08-01 |

Abbreviation: AE: Adverse event.

a. AE3 and AE11: Febrile neutropenia was reported as an AE and not defined as per NCCN criterion

b. Sites may have hospitalized patients for treatment per institutional protocol or socio-economic factors

eTable 4. Summary of Infections

| <b>Subject</b> | <b>Treatment Group</b> | <b>Infection</b>                  | <b>Viral or Bacterial</b> |
|----------------|------------------------|-----------------------------------|---------------------------|
| 1              | Plinabulin             | Upper respiratory tract infection | Unknown                   |
|                |                        | Atypical pneumonia                | Unknown                   |
| 2              | Pegfilgrastim          | Bronchitis viral                  | Viral                     |
| 3              | Pegfilgrastim          | Respiratory tract infection viral | Viral                     |
| 4              | Plinabulin             | Respiratory tract infection viral | Viral                     |
| 5              | Pegfilgrastim          | Respiratory tract infection viral | Viral                     |
|                |                        | Tracheobronchitis                 | Unknown                   |
| 6              | Pegfilgrastim          | Influenza                         | Viral                     |
| 7              | Pegfilgrastim          | Subcutaneous abscess              | Unknown                   |
|                |                        | Subcutaneous abscess              | Unknown                   |
|                |                        | Subcutaneous abscess              | Unknown                   |
|                |                        | Skin infection                    | Viral (herpes zoster)     |
|                |                        | Lung infection                    | Viral                     |
|                |                        | Lung infection                    | Unknown                   |
| 8              | Pegfilgrastim          | Hepatitis B reactivation          | Viral                     |
| 9              | Pegfilgrastim          | Herpes zoster                     | Viral                     |
|                |                        | Herpes zoster                     | Viral                     |
| 10             | Pegfilgrastim          | Lung infection                    | Unknown                   |
|                |                        | Lung infection                    | Unknown                   |

| <b>Subject</b> | <b>Treatment Group</b> | <b>Infection</b> | <b>Viral or Bacterial</b> |
|----------------|------------------------|------------------|---------------------------|
|                |                        | Lung infection   | Unknown                   |
| 11             | Plinabulin             | Lung infection   | Unknown                   |
| 12             | Plinabulin             | Lung infection   | Unknown                   |
|                |                        | Lung infection   | Unknown                   |

eTable 5. Summary and Analysis of Patients With Neutrophil-to-Lymphocyte Ratio (NLR) >5 After Days 7-15 in Cycle 1

| Parameter        | Visit          | Pegfilgrastim (N=53)<br>n (sample size, %) | Plinabulin (N=52)<br>n (sample size, %) | Docetaxel + Plinabulin-40 vs Docetaxel + Pegfilgrastim -6 (95% CI) | Aspin-Welch Unequal-Variance T-Test p-value |
|------------------|----------------|--------------------------------------------|-----------------------------------------|--------------------------------------------------------------------|---------------------------------------------|
| <b>NLR &gt;5</b> | Cycle 1 Day 8  | 23 (50, 46.00%)                            | 2 (52, 3.85%)                           | -42.15 (-56.92, -27.38)                                            | <0.0001                                     |
|                  | Cycle 1 Day 9  | 30 (51, 58.82%)                            | 0                                       | -58.82 (-72.33, -45.32)                                            |                                             |
|                  | Cycle 1 Day 10 | 34 (52, 65.38%)                            | 0                                       | -65.38 (-78.32, -52.45)                                            |                                             |
|                  | Cycle 1 Day 15 | 24 (51, 47.06%)                            | 2 (52, 3.85%)                           | -43.21 (-57.87, -28.55)                                            |                                             |

Abbreviations: CI: Confidence interval; ITT: Intent-to-treat; N: Total number of patients; n: Number of patients; NLR: Neutrophil-to-lymphocyte ratio.

Pegfilgrastim Arm: Docetaxel (75 mg/m<sup>2</sup>) + pegfilgrastim (6 mg); Plinabulin Arm: Docetaxel (75 mg/m<sup>2</sup>) + plinabulin (40 mg)

eTable 6. Summary and Analysis of Patients With Promyelocyte Plus Myelocyte Counts >0 After Days 7-15 in Cycle 1—ITT Analysis Set

| Parameter                                           | Visit          | Pegfilgrastim<br>(N=53)<br>n (sample size, %) | Plinabulin<br>(N=52)<br>n (sample size, %) | Plinabulin vs Peg<br>(95% CI, %) | Aspin-<br>Welch<br>Unequal-<br>Variance<br>T-Test<br>p-value |
|-----------------------------------------------------|----------------|-----------------------------------------------|--------------------------------------------|----------------------------------|--------------------------------------------------------------|
| <b>Promyelocyte<br/>s plus<br/>myelocytes &gt;0</b> | Cycle 1 Day 8  | 22 (50, 44.00 %)                              | 0                                          | -44.00 (-57.76, -30.24)          | 0.00026                                                      |
|                                                     | Cycle 1 Day 9  | 25 (51, 49.02 %)                              | 4 (51, 7.84 %)                             | -41.18 (-56.75, -25.60)          |                                                              |
|                                                     | Cycle 1 Day 10 | 20 (52, 38.46 %)                              | 3 (51, 5.88 %)                             | -32.58 (-47.29, -17.86)          |                                                              |
|                                                     | Cycle 1 Day 15 | 3 (51, 5.88 %)                                | 1 (52, 1.92 %)                             | -3.96 (-11.42, 3.50)             |                                                              |

Abbreviations: CI: Confidence interval; ITT: Intent-to-treat; N: Total number of patients; n: Number of patients.  
Pegfilgrastim Arm: Docetaxel (75 mg/m<sup>2</sup>) + pegfilgrastim (6 mg); Plinabulin Arm: Docetaxel (75 mg/m<sup>2</sup>) + plinabulin (40 mg)



eTable 7. Summary and Analysis of Patients With Thrombocytopenia (All Grades) in Cycles 1-4

| Parameter                     | Cycles        | Docetaxel + Pegfilgrastim 6.0mg (N=53)<br>n (sample size, %) | Docetaxel + Plinabulin 40 mg (N=52)<br>n (sample size, %) | Docetaxel + Plinabulin 40 mg vs Docetaxel + Pegfilgrastim 6.0mg (95% CI) | Barnard's Test p-value |
|-------------------------------|---------------|--------------------------------------------------------------|-----------------------------------------------------------|--------------------------------------------------------------------------|------------------------|
| Thrombocytopenia (All Grades) | Cycle 1       | 19 (53, 35.85%)                                              | 10 (52, 19.23%)                                           | -16.62 (-33.39, 0.16)                                                    | 0.062                  |
|                               | Cycle 2       | 4 (51, 7.84%)                                                | 5 (51, 9.80%)                                             | 1.96 (-9.04, 12.96)                                                      | 0.818                  |
|                               | Cycle 3       | 2 (45, 4.44%)                                                | 6 (46, 13.04%)                                            | 8.60 (-2.85, 20.04)                                                      | 0.162                  |
|                               | Cycle 4       | 2 (39, 5.13%)                                                | 4 (45, 8.89%)                                             | 3.76 (-7.06, 14.58)                                                      | 0.595                  |
|                               | Cycles 1 to 4 | 19 (53, 35.85%)                                              | 10 (52, 19.23%)                                           | -16.62 (-33.39, 0.16)                                                    | 0.062                  |

Abbreviations: CI: Confidence interval; N: Total number of patients; n: Number of patients.

eTable 8. Summary and Analysis of EQ-5D-5L Evaluation—Safety Analysis Set

| <b>Parameter</b>           | <b>Study Day</b>      | <b>Analysis</b> | <b>Docetaxel + Pegfilgrastim-6 (N=53)</b> | <b>Doc + Plin-40 (N=52)</b> |
|----------------------------|-----------------------|-----------------|-------------------------------------------|-----------------------------|
| <b>EQ5D02-EQ VAS Score</b> | Across all Timepoints | LS Means (SE)   | 79.1 (1.01)                               | 78.5 (1.00)                 |
|                            |                       | Mean (95% CI)   |                                           | -0.5 (-3.4, 2.3)            |
|                            |                       | p-value         |                                           | 0.7117                      |
| <b>Health Utility</b>      | Across all Timepoints | LS Means (SE)   | 0.812 (0.0094)                            | 0.816 (0.0093)              |
|                            |                       | Mean (95% CI)   |                                           | 0.004 (-0.022, 0.030)       |
|                            |                       | p-value         |                                           | 0.764                       |

Abbreviations: CI: Confidence interval; LS: Least squares N: Total number of patients; SE: Standard error. LS Means, SE, Mean (95% CI), and p-value computed using the following repeated measures mixed model: score = treatment arm + baseline score.

eTable 9. Summary of Patients With Bone Metastasis

| <b>Subject</b> | <b>Treatment Group</b> | <b>Medical History Term</b>                           |
|----------------|------------------------|-------------------------------------------------------|
| 1              | Plinabulin             | Bone Metastasis                                       |
| 2              | Pegfilgrastim          | Back Pain due to Bone Metastasis from Prostate Cancer |
|                |                        | Bone Metastasis from Prostate Cancer                  |
| 3              | Plinabulin             | Bone Metastasis                                       |
|                |                        | Meningioma TH1/2 of the Spine                         |
| 4              | Plinabulin             | Bone Metastasis                                       |
| 5              | Plinabulin             | Bone Metastasis                                       |
| 6              | Plinabulin             | Bone Metastasis                                       |
| 7              | Pegfilgrastim          | Bone Metastasis                                       |
| 8              | Pegfilgrastim          | Bone Metastasis                                       |
| 9              | Plinabulin             | Ache (Osseious Metastasis)                            |
| 10             | Plinabulin             | Extensive Bone Metastasis                             |

eFigure 1. Mean Change From Baseline for Platelets (Gi/L) by Study Day for Cycle 1—ITT Analysis Set

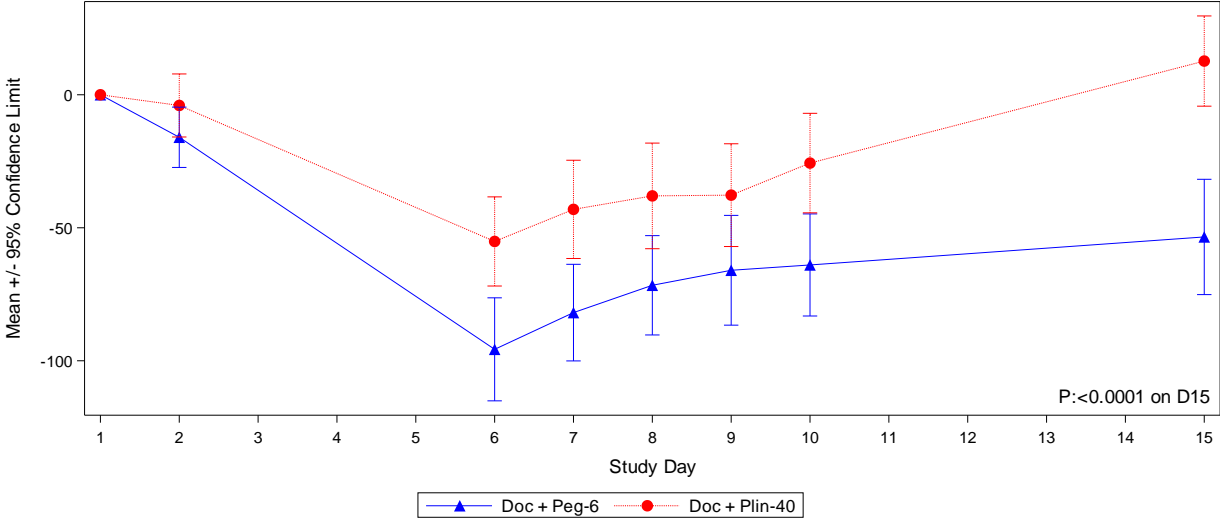

eFigure 2. Summary and Analysis of Patients With Band Counts >0, Cycle 1, Days 1-15

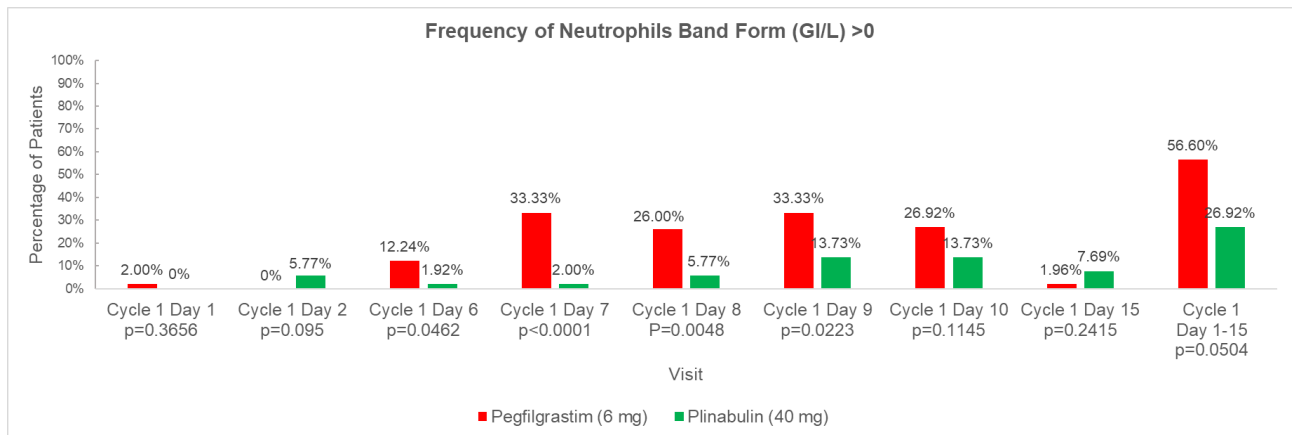

P-value based on Aspin-Welch Unequal-Variance T-Test.

Pegfilgrastim Arm: Docetaxel (75 mg/m<sup>2</sup>) + pegfilgrastim (6 mg); Plinabulin Arm: Docetaxel (75 mg/m<sup>2</sup>) + plinabulin (40 mg)
