# Supplementary material for: Efficacy of Plinabulin vs Pegfilgrastim for Prevention of Docetaxel-Induced Neutropenia in Patients With Solid Tumors: A Randomized Clinical Trial
Source: PubMed Central journal article supplement — JAMA Netw Open. 2022 Jan 27;5(1):e2145446. doi: 10.1001/jamanetworkopen.2021.45446 (PMC8796017; doi:10.1001/jamanetworkopen.2021.45446), 2022-01-27
Supplement: jamanetwopen-e2145446-s003.pdf [file jamanetwopen-e2145446-s003.pdf]

## Data Sharing Statement

Blayney. Efficacy of Plinabulin vs Pegfilgrastim for Prevention of Docetaxel-Induced Neutropenia in Patients With Solid Tumors. *JAMA Netw Open*. Published January 27, 2022. doi:10.1001/jamanetworkopen.2021.45446

### Data

**Data available:** Yes

**Data types:** Deidentified participant data

**How to access data:** Data for an approved meta analysis will be made available by Dr. Mohanlal.

**When available:** With publication

### Supporting Documents

**Document types:** None

### Additional Information

**Who can access the data:** Researchers whose proposed use of the data has been approved

**Types of analyses:** Meta analysis

**Mechanisms of data availability:** After approval of a proposal with a signed data access agreement

**Any additional restrictions:** None
